# Supplementary material for: A biophysically constrained computational model of the action potential of mouse urinary bladder smooth muscle
Source: PubMed Central journal article supplement (PMC6061979; doi:10.1371/journal.pone.0200712), 2018-07-26
Supplement: pone.0200712.s003.pdf [file pone.0200712.s003.pdf]

**S1 Table: Definitions of the equation symbols**

| <b>Symbols</b>        | <b>Meaning</b>                                 |
|-----------------------|------------------------------------------------|
| $v$                   | membrane potential                             |
| $V_{0.5}$             | half (in)activation constant                   |
| $V_h$                 | holding potential                              |
| $Q_{10}$              | Temperature coefficient                        |
| $Ca^{2+}$             | calcium ion                                    |
| $Na^+$                | sodium ion                                     |
| $K^+$                 | potassium ion                                  |
| $Cl^-$                | chloride ion                                   |
| $[Ca^{2+}]_i$         | intracellular calcium                          |
| $[Ca^{2+}]_o$         | extracellular calcium                          |
| $E_{rev}$             | reversal potential                             |
| $E_{CaL}$             | reversal potential of $I_{CaL}$                |
| $E_{CaT}$             | reversal potential of $I_{CaT}$                |
| $E_h$                 | reversal potential of $I_h$                    |
| $E_K$                 | reversal potential of potassium currents       |
| $I$                   | current                                        |
| $I_{CaL}$             | L-type $Ca^{2+}$ current                       |
| $I_{CaT}$             | T-type $Ca^{2+}$ current                       |
| $I_{KCNQ}$            | Voltage-gated $K^+$ current (KCNQ)             |
| $I_{Kv1}$             | Voltage-gated $K^+$ current (Kv1)              |
| $I_{BK}$              | $Ca^{2+}$ -activated $K^+$ current (BK)        |
| $I_{IK}$              | $Ca^{2+}$ -activated $K^+$ current (IK)        |
| $I_{SK}$              | $Ca^{2+}$ -activated $K^+$ current (SK)        |
| $I_h$                 | Inward rectifying current                      |
| $I_{KATP}$            | ATP activated $K^+$ current                    |
| $\overline{g_{CaL}}$  | maximum conductance of $I_{CaL}$               |
| $\overline{g_{CaT}}$  | maximum conductance of $I_{CaT}$               |
| $\overline{g_{KCNQ}}$ | maximum conductance of $I_{Kv7}$               |
| $\overline{g_{Kv1}}$  | maximum conductance of $I_{Kv1}$               |
| $\overline{g_{BK}}$   | maximum conductance of $I_{BK}$                |
| $\overline{g_{IK}}$   | maximum conductance of $I_{IK}$                |
| $\overline{g_{SK}}$   | maximum conductance of $I_{SK}$                |
| $\overline{g_h}$      | maximum conductance of $I_h$                   |
| $\overline{g_{KATP}}$ | maximum conductance of $I_{KATP}$              |
| $n$                   | Activation gate of $I_{CaL}$                   |
| $h_v$                 | Voltage gated inactivation gate of $I_{CaL}$   |
| $h_c$                 | $Ca^{2+}$ gated inactivation gate of $I_{CaL}$ |
| $b$                   | Activation gate of $I_{CaT}$                   |
| $c$                   | Inactivation gate of $I_{CaT}$                 |
| $x$                   | Activation gate of $I_{KCNQ}$                  |
| $z$                   | Inactivation gate of $I_{KCNQ}$                |
| $p$                   | Activation gate of $I_{Kv1}$                   |
| $q$                   | Inactivation gate of $I_{Kv1}$                 |

---

|         |                                      |
|---------|--------------------------------------|
| l       | Activation gate of $I_{IK}$          |
| k       | Inactivation gate of $I_{IK}$        |
| o       | Opening state of $I_{BK}$            |
| r       | $Ca^{2+}$ activated gate of $I_{SK}$ |
| s       | Activation gate of $I_h$             |
| t       | Activation gate of $I_{KATP}$        |
| $ATP_h$ | disassociation constant              |
| $ATP_i$ | intracellular ATP concentration      |
