# Supplementary material for: A biophysically constrained computational model of the action potential of mouse urinary bladder smooth muscle
Source: PubMed Central journal article supplement (PMC6061979; doi:10.1371/journal.pone.0200712), 2018-07-26
Supplement: pone.0200712.s004.pdf [file pone.0200712.s004.pdf]

**S2 Table: Constant parameter values used in model simulations.**

| <b>Parameters</b>            | <b>Values</b>             |
|------------------------------|---------------------------|
| $[\text{Ca}^{2+}]_i$         | 150 nM                    |
| $E_{\text{KATP}}$            | - 21 mV                   |
| $E_{\text{CaL}}$             | 51mV                      |
| $E_{\text{CaT}}$             | 51mV                      |
| $E_{\text{K}}$               | - 75 mV                   |
| $E_{\text{h}}$               | - 40 mV                   |
| $\text{ATP}_h$               | 0.006 mM                  |
| $\text{ATP}_i$               | 0.1 mM                    |
| $\overline{g_{\text{CaL}}}$  | 0.0006 S/cm <sup>2</sup>  |
| $\overline{g_{\text{CaT}}}$  | 0.0003 S/cm <sup>2</sup>  |
| $\overline{g_{\text{KCNQ}}}$ | 0.0001 S/cm <sup>2</sup>  |
| $\overline{g_{\text{Kv1}}}$  | 0.0008 S/cm <sup>2</sup>  |
| $\overline{g_{\text{BK}}}$   | 0.00015 S/cm <sup>2</sup> |
| $\overline{g_{\text{IK}}}$   | 0.0001 S/cm <sup>2</sup>  |
| $\overline{g_{\text{SK}}}$   | 0.0001 S/cm <sup>2</sup>  |
| $\overline{g_{\text{h}}}$    | 0.0002 S/cm <sup>2</sup>  |
| $\overline{g_{\text{KATP}}}$ | 0.0004 S/cm <sup>2</sup>  |
| $d$                          | 0.41 $\mu\text{m}$        |
| $\tau_r$                     | 1800 ms                   |
